# Supplementary material
Source: publisher site journal article supplement (https://www.spandidos-publications.com/8648/downloadSupplementary)
Supplement: Supplementary file 1 [file downloadSupplementary]

Table SI. Sequences of siRNAs used in this study.

| siRNA     | Sequence (5'-3')              | Gene information |
|-----------|-------------------------------|------------------|
| siNC      |                               |                  |
| Sense     | 5'-GGAUCUACGUGAUCGAUCAUU-3'   | —                |
| Antisense | 5'-UGAUCGAUCACGUAGAUCUU-3'    | —                |
| siNrf2    |                               |                  |
| Sense     | 5'-CAGUCUUCAUUGCUACUAAUCUU-3' | NM_001145412.3   |
| Antisense | 5'-UUAGUAGCAAUGAAGACUGGGUU-3' | NM_001145412.3   |

Nrf2, nuclear factor erythroid 2-related factor 2; siRNA, small interfering RNA; NC, negative control.
